# Supplementary material for: Cordyline fruticosa(L.) A. Chev. leaves: isolation, HPLC/MS profiling and evaluation of nephroprotective and hepatoprotective activities supported by molecular docking
Source: Royal Society of Chemistry journal article supplement (doi:10.1039/d1nj02663a), 2021-01-01

## Supplementary data

### New Journal of Chemistry

Manuscript ID NJ-ART-05-2021-002663

#### ***Cordyline fruticosa* (L.) A. Chev. Leaves: Isolation, HPLC/MS profiling and evaluation of nephroprotective and hepatoprotective activities supported by molecular docking.**

Mona Raslan<sup>1,\*</sup>, Rehab F. Taher<sup>2</sup>, Ahmed A. Al-Karmalawy<sup>3</sup>, Dalia El-Ebeedy<sup>4</sup>, Angham G. Metwaly<sup>5</sup>, Nourhan M. Elkateeb<sup>6</sup>, Aml Ghanem<sup>7</sup>, Reem A. Elghaish<sup>8</sup>, Ahmed I. Abd El Maksoud<sup>9</sup>

<sup>1</sup> Pharmacognosy Department, National Research Centre, Dokki, 12622 Giza, Egypt.

<sup>2</sup> Chemistry of Natural Compounds Department, National Research Centre, 12622 Giza, Egypt.

<sup>3</sup> Department of Pharmaceutical Medicinal Chemistry, Faculty of Pharmacy, Horus University-Egypt, New Damietta 34518, Egypt.

<sup>4</sup> Pharmaceutical Biotechnology Department, Faculty of Biotechnology, Misr University for Science and Technology, Giza, Egypt.

<sup>5</sup> Misr University for Science and Technology, Giza, Egypt.

<sup>6</sup> Misr University for Science and Technology, Giza, Egypt.

<sup>7</sup> Department of Molecular Biology, Genetic Engineering and Biotechnology Research Institute, University of Sadat City, Sadat City, Egypt.

<sup>8</sup> Zewail city for science and technology, Giza, Egypt.

<sup>9</sup> Industrial Biotechnology Department, Genetic Engineering and Biotechnology Research Institute, University of Sadat City, Sadat City, Egypt.

\* Corresponding author. E-mail address: monaazzam78@gmail.com

**Figure SI 1:** 2 D pictures representing the binding interactions of the tested isolated compounds from *Cordyline fruticosa* L. (**1-12**) inside the binding pocket of the TNF- $\alpha$  protein compared to both silymarin (**13**) and the docked co-crystallized inhibitor (**14**).

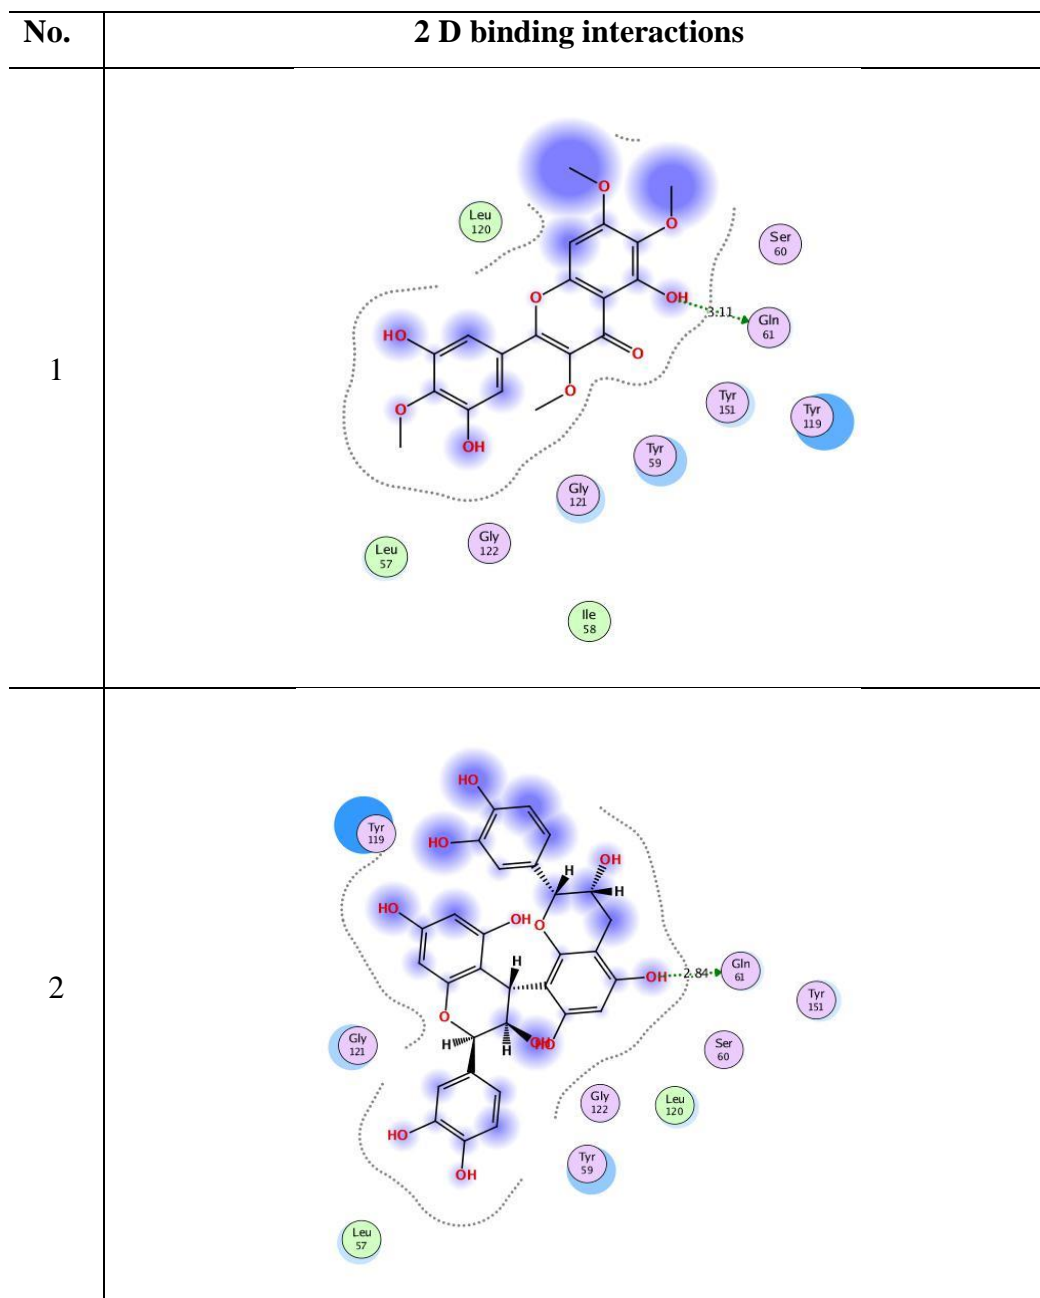

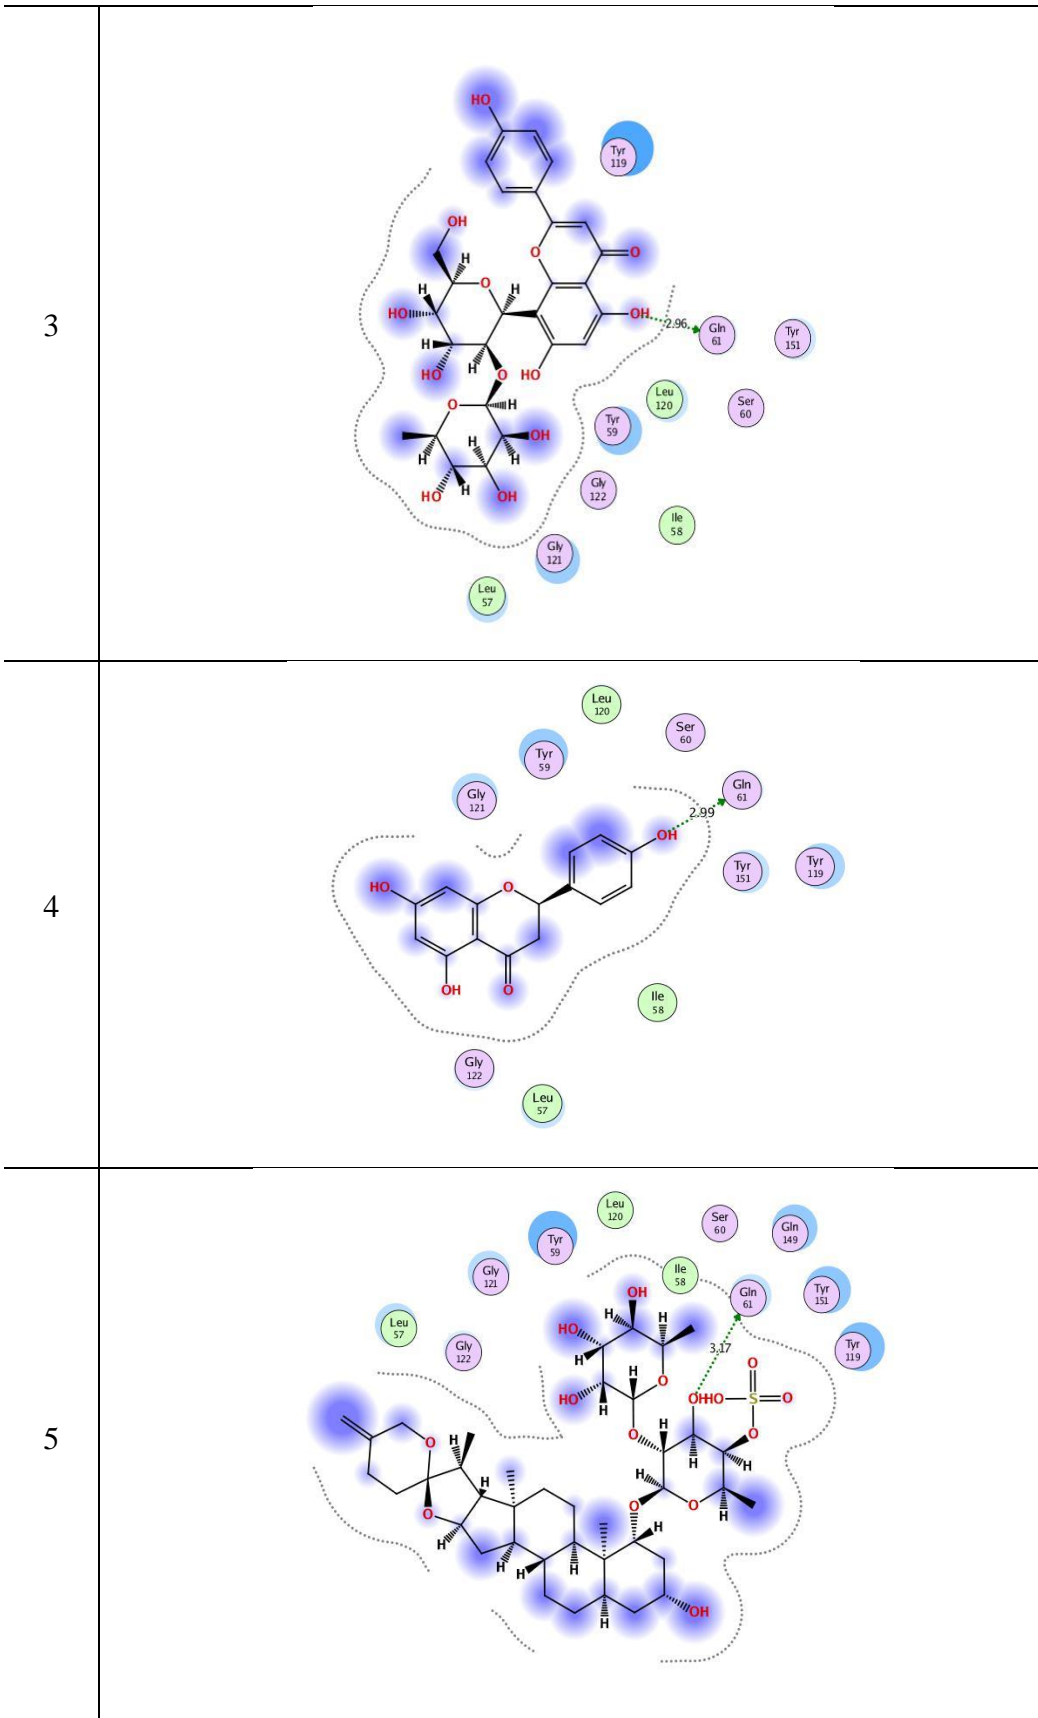

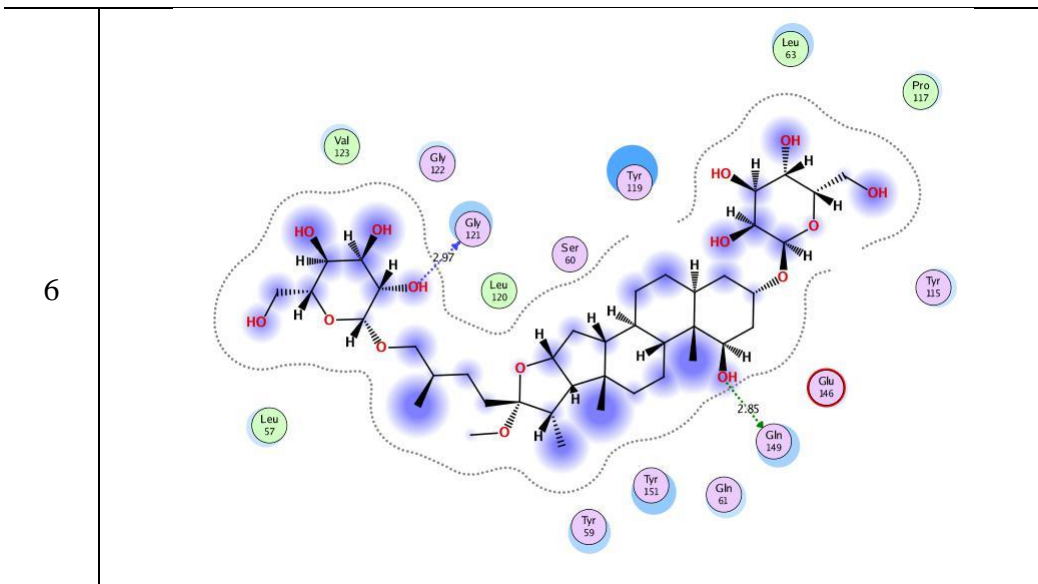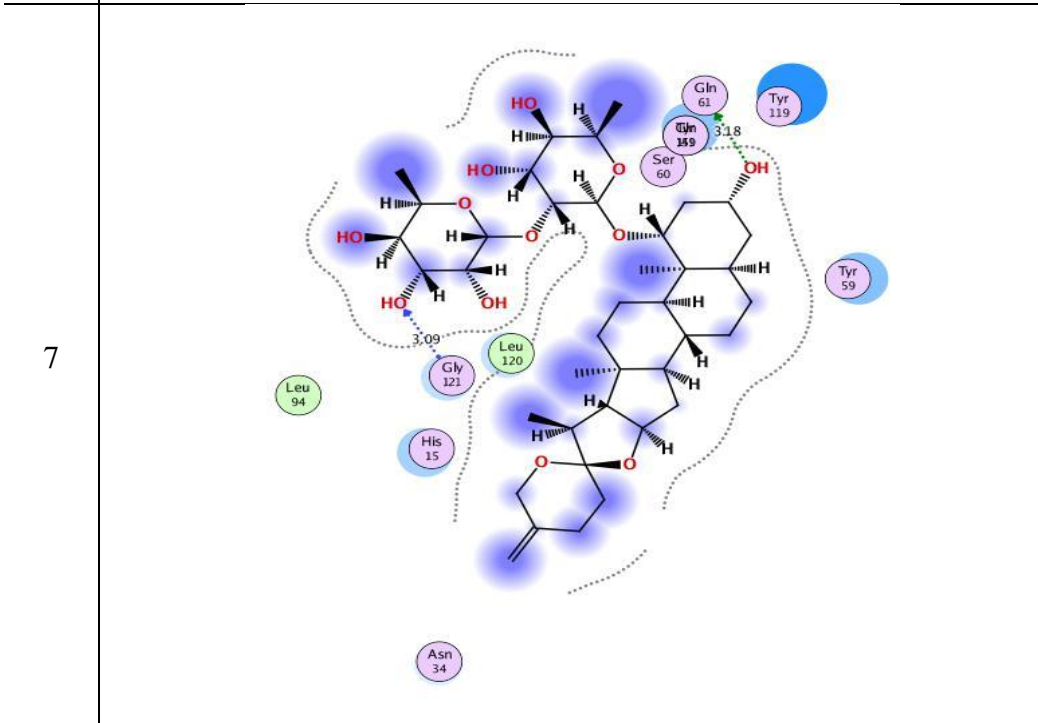

8

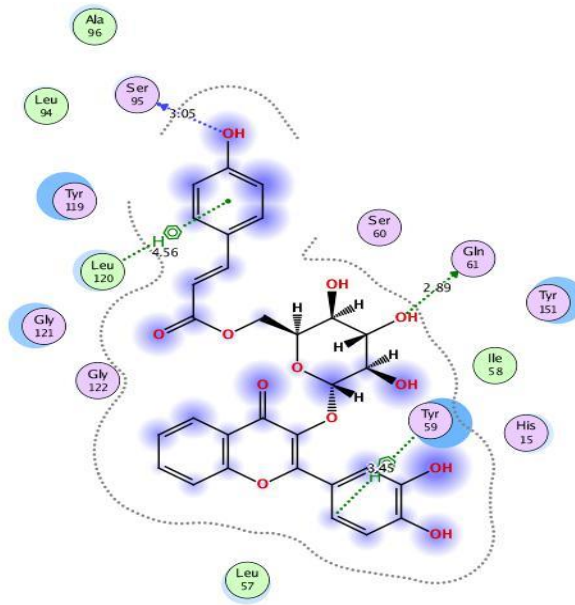

9

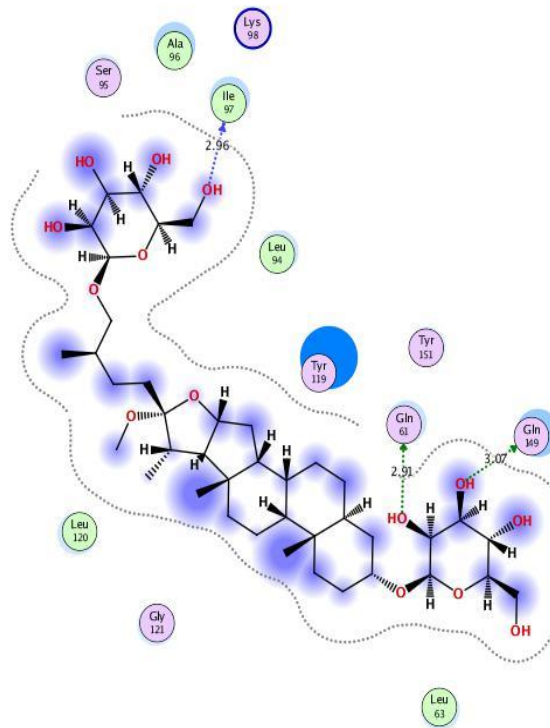

10

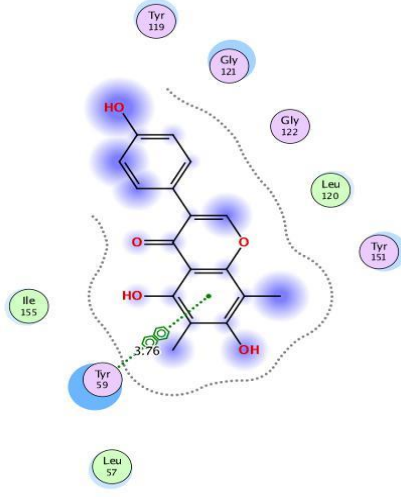

11

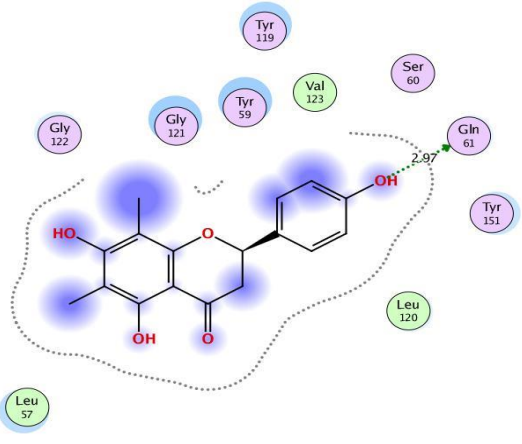

12

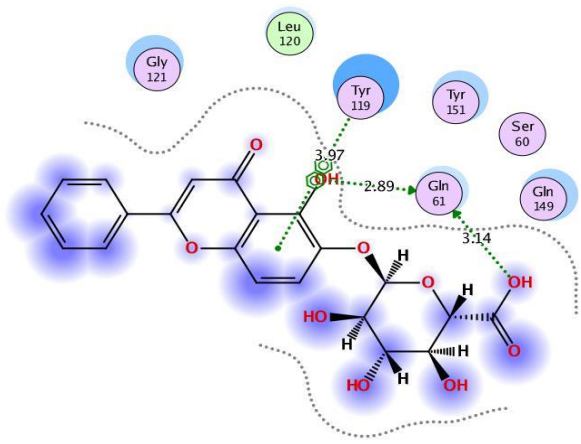

13

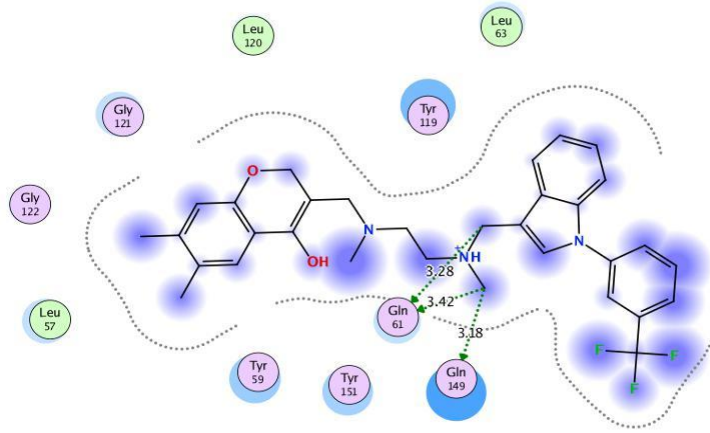

14

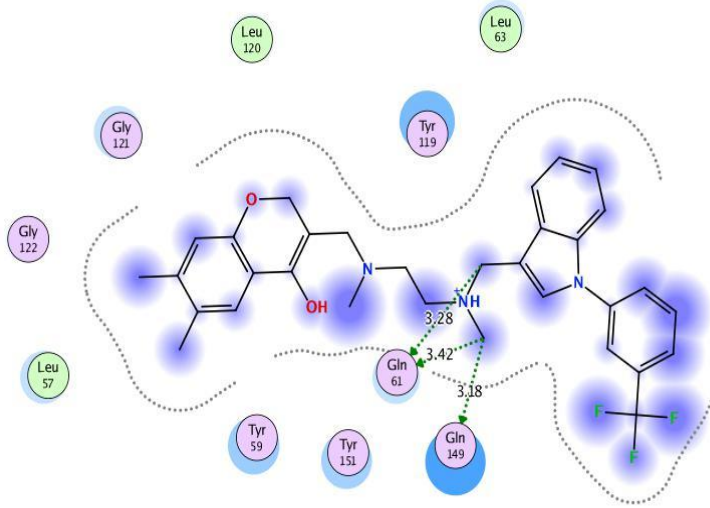

Supplement: d1nj02663a1.pdf [file d1nj02663a1.pdf]
